# Supplementary material for: Safety and Suitability of an Infant Formula Manufactured from Extensively Hydrolysed Protein in Healthy Term Infants
Source: MDPI journal article supplement (doi:10.3390/nu15081901), 2023-04-14
Supplement: s1 [file s1]

## Supplementary Materials (Otten et al. Nutrients 2023)

Table S1: Weight gain (g/day) between 30 days of age (V1) and 120 days of age (V4) – Sensitivity analysis including potential confounding factors

|     |                                 | <i>n</i> | LSM   | SEM  | 95% CI (two-sided) | Two-sided superiority <i>p</i> value | 97.5% CI (one-sided) | One-sided non-inferiority <i>p</i> value <sup>a</sup> |
|-----|---------------------------------|----------|-------|------|--------------------|--------------------------------------|----------------------|-------------------------------------------------------|
| PPS | eHF                             | 149      | 28.99 | 0.68 | [27.29;30.68]      |                                      |                      |                                                       |
|     | CF                              | 148      | 28.79 | 0.69 | [27.07;30.51]      |                                      |                      |                                                       |
|     | eHF vs CF                       |          | 0.20  | 0.48 |                    |                                      | [-0.75;+inf]         | <0.0001                                               |
|     | Product                         |          |       |      |                    | 0.6784                               |                      |                                                       |
|     | Baseline weight                 |          |       |      |                    | 0.0007                               |                      |                                                       |
|     | Sex                             |          |       |      |                    | 0.1470                               |                      |                                                       |
|     | Birth weight                    |          |       |      |                    | 0.5449                               |                      |                                                       |
|     | Gestational age                 |          |       |      |                    | 0.0040                               |                      |                                                       |
|     | Age of mother (at infant birth) |          |       |      |                    | 0.0510                               |                      |                                                       |
|     | BMI of mother (at delivery)     |          |       |      |                    | 0.0174                               |                      |                                                       |
|     | Educational level of mother     |          |       |      |                    | 0.6572                               |                      |                                                       |
| FAS | eHF                             | 158      | 28.85 | 1.09 | [26.37;31.33]      |                                      |                      |                                                       |
|     | CF                              | 155      | 28.74 | 1.09 | [26.24;31.23]      |                                      |                      |                                                       |
|     | eHF vs CF                       |          | 0.11  | 0.49 |                    |                                      | [-0.85;+inf]         | <0.0001                                               |
|     | Product                         |          |       |      |                    | 0.8170                               |                      |                                                       |
|     | Baseline weight                 |          |       |      |                    | 0.0015                               |                      |                                                       |
|     | Sex                             |          |       |      |                    | 0.0262                               |                      |                                                       |
|     | Birth weight                    |          |       |      |                    | 0.5287                               |                      |                                                       |
|     | Gestational age                 |          |       |      |                    | 0.0332                               |                      |                                                       |
|     | Age of mother (at infant birth) |          |       |      |                    | 0.2374                               |                      |                                                       |
|     | BMI of mother (at delivery)     |          |       |      |                    | 0.1443                               |                      |                                                       |
|     | Educational level of mother     |          |       |      |                    | 0.7183                               |                      |                                                       |

<sup>a</sup> non-inferiority margin: -3 g/day

BMI: body mass index (kg/m<sup>2</sup>); CF: control formula; CI: confidence interval; eHF: infant formula

manufactured from extensively hydrolysed whey protein; FAS: full analysis set; inf: infinity; LSM: least

square means;  $n$ : number of observations; PPS: per protocol set; SEM: standard error of mean

Table S2: Mean daily gain in weight, length and head circumference from 30 days of age (V1) (FAS), mean (SD)

|                                         | Visit | Age at visit (days) | eHF ( <i>n</i> = 158) | CF ( <i>n</i> = 157) <sup>a</sup> | BF ( <i>n</i> = 41) <sup>b</sup> |
|-----------------------------------------|-------|---------------------|-----------------------|-----------------------------------|----------------------------------|
| <b>Weight gain (g/day)</b>              | 2     | 60                  | 33.6 (9.1)            | 33.4 (9.5)                        | 29.4 (4.8)                       |
|                                         | 3     | 90                  | 31.5 (6.1)            | 31.0 (5.7)                        | 30.1 (4.6)                       |
|                                         | 4     | 120                 | 29.1 (4.9)            | 28.8 (4.4)                        | 29.2 (4.1)                       |
|                                         | 5     | 180                 | 23.2 (4.1)            | 22.7 (3.2)                        | 23.1 (3.8)                       |
| <b>Length gain (mm/day)</b>             | 2     | 60                  | 1.1 (0.5)             | 1.1 (0.5)                         | 1.3 (0.6)                        |
|                                         | 3     | 90                  | 1.1 (0.4)             | 1.1 (0.4)                         | 1.2 (0.5)                        |
|                                         | 4     | 120                 | 1.1 (0.3)             | 1.0 (0.3)                         | 1.1 (0.4)                        |
|                                         | 5     | 180                 | 0.9 (0.2)             | 0.9 (0.2)                         | 0.9 (0.3)                        |
| <b>Head circumference gain (mm/day)</b> | 2     | 60                  | 0.6 (0.3)             | 0.6 (0.3)                         | 0.7 (0.3)                        |
|                                         | 3     | 90                  | 0.5 (0.2)             | 0.5 (0.2)                         | 0.6 (0.2)                        |
|                                         | 4     | 120                 | 0.5 (0.1)             | 0.5 (0.2)                         | 0.5 (0.1)                        |
|                                         | 5     | 180                 | 0.4 (0.1)             | 0.4 (0.1)                         | 0.5 (0.1)                        |

No statistically significant differences between CF and eHF were observed.

<sup>a</sup> Missing values in CF: weight gain: V2: *n* = 1; V3: *n* = 3; V4, V5: *n* = 2 length gain: V2: *n* = 1; V3: *n* = 2; V4, V5: *n* = 3; head circumference gain: V2: *n* = 1; V3, V4, V5: *n* = 3

<sup>b</sup> Missing values in BF: head circumference gain: V3: *n* = 1

BF: breastfed reference group; CF: control formula; eHF: infant formula manufactured from extensively hydrolysed whey protein; FAS: full analysis set; *n*: number of observations; SD: standard deviation; V: visit

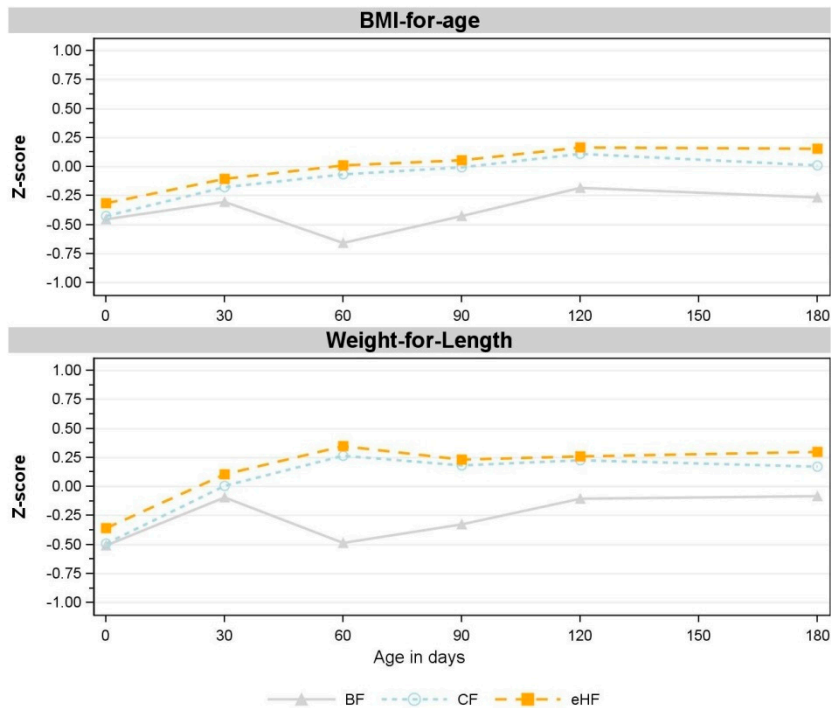

Figure S1: Observed mean z-scores for BMI-for-age and weight-for-length between birth and 180 days of age (V5) (FAS)

V1: 30 days; V2: 60 days; V3: 90 days; V4: 120 days; V5: 180 days

No statistically significant differences between CF and eHF were observed.

Missing values in CF: BMI-for-age: V1:  $n = 2$ ; V3:  $n = 3$ ; V4, V5:  $n = 2$ ; weight-for-length: V1:  $n = 2$ ; V3:  $n = 3$ , V4, V5:  $n = 2$

Missing values in eHF: BMI-for-age: V4:  $n = 1$ ; weight-for-length: V4:  $n = 1$

BF: breastfed reference group; BMI: body mass index ( $\text{kg}/\text{m}^2$ ); CF: control formula; eHF: formula manufactured from extensively hydrolysed whey protein; FAS: full analysis set;  $n$ : number of observations; V: visit

Table S3: Feedings characteristics (PPS), mean (SD)

|                                                            | Visit | Age at visit (days) | eHF (n = 149)             | CF (n = 148)  | BF (n = 41) |
|------------------------------------------------------------|-------|---------------------|---------------------------|---------------|-------------|
| <b>Average number of feedings per day</b>                  | 1     | 30                  | 7.1 (0.8)                 | 7.0 (0.8)     | 7.4 (0.6)   |
|                                                            | 2     | 60                  | 6.1 (0.5)                 | 6.1 (0.5)     | 6.6 (0.5)   |
|                                                            | 3     | 90                  | 5.8 (0.5)                 | 5.7 (0.5)     | 5.8 (0.5)   |
|                                                            | 4     | 120                 | 5.7 (0.6)                 | 5.6 (0.6)     | 5.5 (0.5)   |
|                                                            | 5     | 180                 | 4.7 (0.6)                 | 4.6 (0.6)     | 4.5 (0.6)   |
| <b>Average amount of study product per day (mL/day)</b>    | 1     | 30                  | 741.9 (125.5)             | 745.6 (125.0) | -           |
|                                                            | 2     | 60                  | 777.9 (90.2)              | 777.0 (91.3)  | -           |
|                                                            | 3     | 90                  | 813.1 (57.7) <sup>a</sup> | 794.4 (62.0)  | -           |
|                                                            | 4     | 120                 | 852.7 (64.2)              | 844.2 (56.9)  | -           |
|                                                            | 5     | 180                 | 844.4 (110.4)             | 838.0 (112.2) | -           |
| <b>Average energy intake from study product (kcal/day)</b> | 1     | 30                  | 489.7 (82.8)              | 492.1 (82.5)  | -           |
|                                                            | 2     | 60                  | 513.4 (59.5)              | 512.8 (60.2)  | -           |
|                                                            | 3     | 90                  | 536.7 (38.1) <sup>a</sup> | 524.3 (40.9)  | -           |
|                                                            | 4     | 120                 | 562.8 (42.4)              | 557.2 (37.6)  | -           |
|                                                            | 5     | 180                 | 557.3 (72.9)              | 553.1 (74.1)  | -           |

<sup>a</sup> CF vs. eHF  $p = 0.0218$  for average amount of study product per day as well as for average energy intake from study product.

BF: breastfed reference group; CF: control formula; eHF: formula manufactured from extensively hydrolysed whey protein;  $n$ : number of observations; PPS: per protocol set; SD: standard deviation; V: visit

Table S4: Descriptive statistics of intervention-emergent adverse events by MedDRA coding (ITT)

|                                                      | eHF<br>( <i>n</i> = 160) |                    | CF<br>( <i>n</i> = 158) |                    | BF<br>( <i>n</i> = 41)  |                    |
|------------------------------------------------------|--------------------------|--------------------|-------------------------|--------------------|-------------------------|--------------------|
|                                                      | Infants<br><i>n</i> (%)  | Events<br><i>n</i> | Infants<br><i>n</i> (%) | Events<br><i>n</i> | Infants<br><i>n</i> (%) | Events<br><i>n</i> |
| <b>All intervention-emergent adverse events</b>      | 10 (6.3%)                | 14                 | 6 (3.8%)                | 11                 | 0 (0.0%)                | 0                  |
| <b>System organ class (SOC)</b>                      |                          |                    |                         |                    |                         |                    |
| Gastrointestinal disorders                           | 5 (3.1%)                 | 5                  | 3 (1.9%)                | 3                  | 0 (0.0%)                | 0                  |
| General disorders and administration site conditions | 1 (0.6%)                 | 1                  | 1 (0.6%)                | 2                  | 0 (0.0%)                | 0                  |
| Infections and infestations                          | 2 (1.3%)                 | 2                  | 2 (1.3%)                | 2                  | 0 (0.0%)                | 0                  |
| Investigations                                       | 1 (0.6%)                 | 1                  | 0 (0.0%)                | 0                  | 0 (0.0%)                | 0                  |
| Psychiatric disorders                                | 2 (1.3%)                 | 2                  | 2 (1.3%)                | 2                  | 0 (0.0%)                | 0                  |
| Respiratory, thoracic and mediastinal disorders      | 2 (1.3%)                 | 2                  | 0 (0.0%)                | 0                  | 0 (0.0%)                | 0                  |
| Skin and subcutaneous tissue disorders               | 0 (0.0%)                 | 0                  | 1 (0.6%)                | 1                  | 0 (0.0%)                | 0                  |
| Surgical and medical procedures                      | 1 (0.6%)                 | 1                  | 1 (0.6%)                | 1                  | 0 (0.0%)                | 0                  |
| <b>Preferred term (PT)</b>                           |                          |                    |                         |                    |                         |                    |
| Abdominal pain                                       | 1 (0.6%)                 | 1                  | 1 (0.6%)                | 1                  | 0 (0.0%)                | 0                  |
| Agitation                                            | 1 (0.6%)                 | 1                  | 2 (1.3%)                | 2                  | 0 (0.0%)                | 0                  |
| Body temperature increased                           | 1 (0.6%)                 | 1                  | 0 (0.0%)                | 0                  | 0 (0.0%)                | 0                  |
| Bronchitis                                           | 1 (0.6%)                 | 1                  | 0 (0.0%)                | 0                  | 0 (0.0%)                | 0                  |
| Constipation                                         | 2 (1.3%)                 | 2                  | 1 (0.6%)                | 1                  | 0 (0.0%)                | 0                  |
| Crying                                               | 1 (0.6%)                 | 1                  | 1 (0.6%)                | 1                  | 0 (0.0%)                | 0                  |
| Fungal infection                                     | 0 (0.0%)                 | 0                  | 1 (0.6%)                | 1                  | 0 (0.0%)                | 0                  |
| Immunisation                                         | 1 (0.6%)                 | 1                  | 1 (0.6%)                | 1                  | 0 (0.0%)                | 0                  |
| Pyrexia                                              | 0 (0.0%)                 | 0                  | 1 (0.6%)                | 1                  | 0 (0.0%)                | 0                  |
| Rash                                                 | 0 (0.0%)                 | 0                  | 1 (0.6%)                | 1                  | 0 (0.0%)                | 0                  |
| Regurgitation                                        | 0 (0.0%)                 | 0                  | 1 (0.6%)                | 1                  | 0 (0.0%)                | 0                  |
| Respiratory tract infection                          | 1 (0.6%)                 | 1                  | 0 (0.0%)                | 0                  | 0 (0.0%)                | 0                  |
| Restlessness                                         | 1 (0.6%)                 | 1                  | 0 (0.0%)                | 0                  | 0 (0.0%)                | 0                  |
| Rhinitis                                             | 1 (0.6%)                 | 1                  | 1 (0.6%)                | 1                  | 0 (0.0%)                | 0                  |
| Rhinorrhoea                                          | 1 (0.6%)                 | 1                  | 0 (0.0%)                | 0                  | 0 (0.0%)                | 0                  |
| Vomiting                                             | 2 (1.3%)                 | 2                  | 0 (0.0%)                | 0                  | 0 (0.0%)                | 0                  |

When applying MedDRA coding, one AE can be allocated to multiple SOC/PTs. Therefore, the total number of MedDRA-coded AEs exceeds the total number of recorded AEs.

AE: adverse event; BF: breastfed reference group; CF: control formula; eHF: infant formula manufactured from extensively hydrolysed whey protein; ITT: intention-to-treat population; MedDRA: Medical Dictionary for Regulatory Activities; *n*: number of observations/events; PT: preferred term; SOC: system organ class
